# Supplementary material for: The Glide/Gcm fate determinant controls initiation of collective cell migration by regulating Frazzled
Source: eLife. 2016 Oct 14;5:e15983. doi: 10.7554/eLife.15983 (PMC5114015; doi:10.7554/eLife.15983)
Supplement: Figure 2—source data 1. — This file contains underlying raw data for Figure 2. DOI: http://dx.doi.org/10.7554/eLife.15983.005 [file elife-15983-fig2-data1.xlsx]

## Sheet: Sheet1
Genotypes	WT	fra3/+ (LOF)	repo>GFP	repo>GFP /fra3 (fra LOF)
Migratory Index at 28 hAPF (percentage)	0.95	0.66	0.9	0.7
	1	0.6	0.85	0.65
Genotypes	WT	fra3/+ (LOF)
No of repo cells in each wing	60	66
	56	54
	60	54
	60	56
	66	60
	62	50
	60	62
	51	64
	54	58
	67	58
	45	54
	50	56
	67	61
	68	63
	55	54
	52	62
	60	60
	60
	60
	65
