# Supplementary material for: The Glide/Gcm fate determinant controls initiation of collective cell migration by regulating Frazzled
Source: eLife. 2016 Oct 14;5:e15983. doi: 10.7554/eLife.15983 (PMC5114015; doi:10.7554/eLife.15983)
Supplement: Figure 3—figure supplement 1—source data 1. — This file contains underlying source data for Figure 3—figure supplement 1 and 2. DOI: http://dx.doi.org/10.7554/eLife.15983.009 [file elife-15983-fig3-figsupp1-data1.xlsx]

## Sheet: Sheet1
Figure S2 (Panel i)
Genotypes	nsyb>GFP/+	nsyb>GFP/fra RNAi
Migratory Index at 28 hAPF (percentage)	1	1
Figure S3 (Panel b)
Genotypes	gcmrA87/+	gcm34/+	fra3/+	gcmN7-4/+	gcmrA87/fra3	gcm34/fra3	fra3/gcmN7-4	gcmrA87/gcmN7-4
Migratory Index at 28 hAPF (percentage)	1	1	0.66	0.5135	0.3333	0.25	0.0588	0.25
	0.99	0.99	0.6	0.6	0.3033	0.3	0.03	0.35
								0.25
