# Supplementary material for: The Glide/Gcm fate determinant controls initiation of collective cell migration by regulating Frazzled
Source: eLife. 2016 Oct 14;5:e15983. doi: 10.7554/eLife.15983 (PMC5114015; doi:10.7554/eLife.15983)
Supplement: Figure 3—source data 1. — This file contains underlying raw data for Figure 3. DOI: http://dx.doi.org/10.7554/eLife.15983.007 [file elife-15983-fig3-data1.xlsx]

## Sheet: Sheet1
Genotypes	gcm>GFP	gcm>GFP/+;UAS fra RNAi/+ (fra KD)	gcm>GFP/+;UAS fra RNAi/Uas fra (fra KD Rescue)	gcm>GFP/+;UAS fra/+ (fra GOF)	gcm>GFP/UAS fra∆C
Migratory Index at 28 hAPF (percentage)	0.9333	0.58	0.95	1	0.652
	0.928	0.5	0.9		0.701
	0.85		0.97
	0.89
Time lapse raw data	gcm>GFP	gcm>GFP/+;UAS fra RNAi/+ (fra KD)	gcm>GFP/+;UAS fra/+ (fra GOF)		gcm>GFP	gcm>GFP/+;UAS fra RNAi/+ (fra KD)	gcm>GFP/+;UAS fra/+ (fra GOF)		gcm>GFP	gcm>GFP/+;UAS fra RNAi/+ (fra KD)	gcm>GFP/+;UAS fra/+ (fra GOF)
	Initiation				Costa reach				Migration completion
	18.24	19.3	16.24		21.28	21.24	19.06		25.04	28	24
	18.24	20.06	16		20.32	21.48	17.48		24	28	24
	18.4	19	16		21.36	20.54	17.42		24	24.48	19.48
	18.24	19.48	15.54		22	22.36	18.42		24.16	27.12	20
	18.16	19.24	16		21.44	23.24	19.42		24.24	24.48	22.36
	18.16	19.12	16		22.32	21.12	19.24		24.56	24.24	23.3
	18.16	22.06			22.4	24.48			25.12	26
	18.36	19.06			22.18	24			27.24	25
	18.42	19.3			21.06	22			26.06	27.12
	18.36	19.36			20.54	20.42			23.24	28.18
		19.54				22.12
		20.24				22.48
		19.06				20.42
		19.36				23
