# Supplementary material for: The Glide/Gcm fate determinant controls initiation of collective cell migration by regulating Frazzled
Source: eLife. 2016 Oct 14;5:e15983. doi: 10.7554/eLife.15983 (PMC5114015; doi:10.7554/eLife.15983)
Supplement: Figure 4—source data 1. — This file contains underlying raw data for Figure 4. DOI: http://dx.doi.org/10.7554/eLife.15983.012 [file elife-15983-fig4-data1.xlsx]

## Sheet: Sheet1
Genotypes	gcm>GFP	gcm>GFP /fra3 (fra LOF)	gcm>GFP /fra3; UAS gcm RNAi/+	gcm>GFP /gcmrA87	gcm>GFP /gcmrA87;UAS gcm/+	gcm>GFP/gcm>GFP	gcm>GFP/gcm>GFP;UAS gcm/+	gcm>GFP/+;UAS gcm RNAi/+	gcm>GFP/+;UAS gcm RNAi/UAS gcm	gcm>GFP/+;UAS gcm/+
Migratory Index at 28 hAPF (percentage)	0.9333	0.125	0.05	0.69	0.89	0.45	0.8	0.3	1	1
	0.928	0.1666	0.03	0.58	0.95	0.37	0.93	0.2	0.92
	0.85			0.64	0.98	0.41	0.83		0.95
	0.89
Time lapse raw data
gcm>GFP	gcm>GFP/gcm rA87(gcm LOF)	gcm>GFP/+;UAS gcm/+ (gcm GOF)			gcm>GFP	gcm>GFP/gcm rA87(gcm LOF)	gcm>GFP/+;UAS gcm/+ (gcm GOF)			gcm>GFP	gcm>GFP/gcm rA87(gcm LOF)	gcm>GFP/+;UAS gcm/+ (gcm GOF)
Initiation					Costa reach						Migration completion
18.24	19.04	17.06			21.28	22.4	19.3			25.04	26.56	24.42
18.24	19.04	17.06			20.32	22.56	19.48			24	25.36	21.36
18.4	19.44	17.18			21.36	23.12	19.18			24	26.2	25.12
18.24	19.44	17.18			22	22.56	19.18			24.16	25.12	22.36
18.16	19.2	17.24			21.44	22.4	19.12			24.24	25.44	25
18.16	19.04	17.12			22.32	21.56	19.18			24.56	26.4	24.48
18.16	19.36	17.24			22.4	24	19.18			25.12	26.16	22.06
18.36	19.44	17.24			22.18	24	19.3			27.24	27.36	24
18.42		17.24			21.06		19.54			26.06		22.3
18.36		17.12			20.54		19.18			23.24		24.06
