# Supplementary material for: The Glide/Gcm fate determinant controls initiation of collective cell migration by regulating Frazzled
Source: eLife. 2016 Oct 14;5:e15983. doi: 10.7554/eLife.15983 (PMC5114015; doi:10.7554/eLife.15983)
Supplement: Figure 5—source data 1. — This file contains underlying raw data for Figure 5. DOI: http://dx.doi.org/10.7554/eLife.15983.014 [file elife-15983-fig5-data1.xlsx]

## Sheet: Sheet1
Genotypes	gcm>GFP	gcm>GFP/gcmrA87	gcm>GFP/+;UAS gcm RNAi/+	gcm>GFP/+;UAS gcm/+	gcm>GFP/UAS string	gcm>GFP/UAS dacapo
No of repo cells in each wing	60	48	51	68	71	47
	61	52	55	68	56	60
	62	57	50	71	71	43
	56	54	62	77	81	47
	58	58	48	53	81	56
	62	47	68	78	70	58
	59	49	55	71		53
	61	53	53	88		45
	58	56	48	75		56
	66	54	48	67		60
	58	54	47	63		53
	66	48	45	83		51
	58	44	68	90		56
	62	58	55	72		66
	70	57	50	74		57
	60	62	50	65		45
	62	57	45	77		54
	58	58		70		51
	64	57		65		50
	59	58		76		57
	63	60		68		44
	62	65		78		58
	55	55		68
	59	68		75
	59			63
	58			72
	53			65
	55			72
	60			66
	70			66
	55			66
	76			73
	60			75
	58			70
	65			67
	61			75
	62			67
	55			75
	65
	62
	57
Genotypes	gcm>GFP	gcm>GFP/+;UAS gcm/+	gcm>GFP/UAS string	gcm>GFP/UAS dacapo
Migratory Index at 28 hAPF (percentage)	0.9333	1	0.86	0.88
	0.928		0.7	0.73
	0.85
	0.89
