# Supplementary material for: The Glide/Gcm fate determinant controls initiation of collective cell migration by regulating Frazzled
Source: eLife. 2016 Oct 14;5:e15983. doi: 10.7554/eLife.15983 (PMC5114015; doi:10.7554/eLife.15983)
Supplement: Figure 7—source data 1. — This file contains underlying raw data for Figure 7. DOI: http://dx.doi.org/10.7554/eLife.15983.019 [file elife-15983-fig7-data1.xlsx]

## Sheet: Sheet1
Genotypes	WT	NetA∆/Y	NetB∆/Y	NetA∆NetBTM/Y	NetA∆NetB/Y	NetB>/Y	NetB>/Y;+/+;UAS NetB RNAi/+	NetB>/Y;+/+;UAS NetB RNAi,UAS NetB	NetB>/Y;+/+;UAS NetB/+	NetA>/Y	NetA>/Y;+/+;UAS NetA RNAi/+	NetA>/Y;UAS NetA/+
Migratory Index at 28 hAPF (percentage)	0.95	0.95	0.69	0.73	1	1	0.56	0.8333	0.934	1	1	0.95
	1	1	0.65	0.8	0.99	0.95	0.53	0.9	1	0.98	0.95	0.9
Genotypes	NetB>/Y	NetB>/Y;+/+;UAS NetB/+	NetA>/Y	NetA>/Y;+/+;UAS NetA RNAi/+	NetA>/Y;UAS NetA/+
Migratory Index at 24 hAPF (percentage)	0.21	0.5652	0.4	0.4324	0.3333
	0.15	0.6	0.45	0.5	0.4
