# Supplementary material for: The Glide/Gcm fate determinant controls initiation of collective cell migration by regulating Frazzled
Source: eLife. 2016 Oct 14;5:e15983. doi: 10.7554/eLife.15983 (PMC5114015; doi:10.7554/eLife.15983)
Supplement: Figure 8—source data 1. — This file contains underlying raw data for Figure 8. DOI: http://dx.doi.org/10.7554/eLife.15983.023 [file elife-15983-fig8-data1.xlsx]

## Sheet: Sheet1
Genotypes	gcm>GFP	gcm>GFP/+;UAS unc5 RNAi/+	gcm>GFP/unc58	gcm>GFP/+;UAS unc5/+	gcm>GFP/+;UAS unc5,UAS Unc5 RNAi	gcm>GFP/+;UAS unc5/UAS fra RNAi
Migratory Index at 28 hAPF (percentage)	0.9333	0.8695	0.9	0.47	0.85	0.25
	0.928	0.9	0.85	0.42	0.9	0.2
	0.85	0.92	0.85		0.8
	0.89
Genotypes	gcm>GFP	gcm>GFP/+;UAS unc5/+	gcm>GFP/+;UAS unc5/UAS fra	gcm>GFP/+;UAS fra/+	repo>GFP/+	repo>GFP/UAS unc5 RNAi
Migratory Index at 24 hAPF (percentage)	0.15	0.02	0.45	0.675	0.1	0.27
	0.1	0.04	0.5	0.7	0.14	0.3
					0.08
