# Supplementary material for: The Glide/Gcm fate determinant controls initiation of collective cell migration by regulating Frazzled
Source: eLife. 2016 Oct 14;5:e15983. doi: 10.7554/eLife.15983 (PMC5114015; doi:10.7554/eLife.15983)
Supplement: Figure 9—source data 1. — This file contains underlying raw data for Figure 9. DOI: http://dx.doi.org/10.7554/eLife.15983.026 [file elife-15983-fig9-data1.xlsx]

## Sheet: Sheet1
Genotypes	repo>GFP/+	repo>GFP/+;UAS fra/+
Migratory Index at 28 hAPF (percentage)	0.818	0.8214
	0.78	0.78
	0.85	0.85
Genotypes	repo>GFP/+	repo>GFP/+;UAS fra/+
Migratory Index at 24 hAPF (percentage)	0.1	0.12
	0.14	8
	0.08	0.1066
qRT PCR Relative Fra levels	Repo (0μg)	Repo (1μg)
	0.0173671	0.1197
	0.0266911	0.0907159
	0.0118415
