# Supplementary figures and images for: The Glide/Gcm fate determinant controls initiation of collective cell migration by regulating Frazzled
Source: eLife journal article supplement (doi:10.7554/elife.15983), 2016-10-14

Figure 1- figure supplement 1

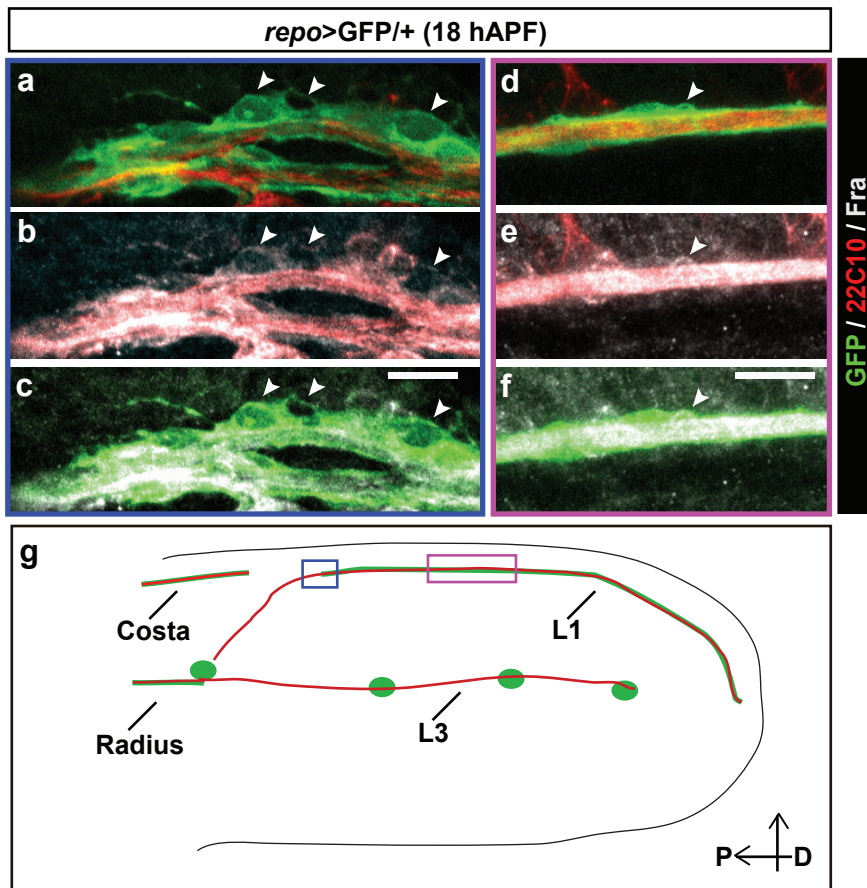

Supplement: supp [file elife-15983-supp-v1.zip]

**Figure 7- figure supplement 2**

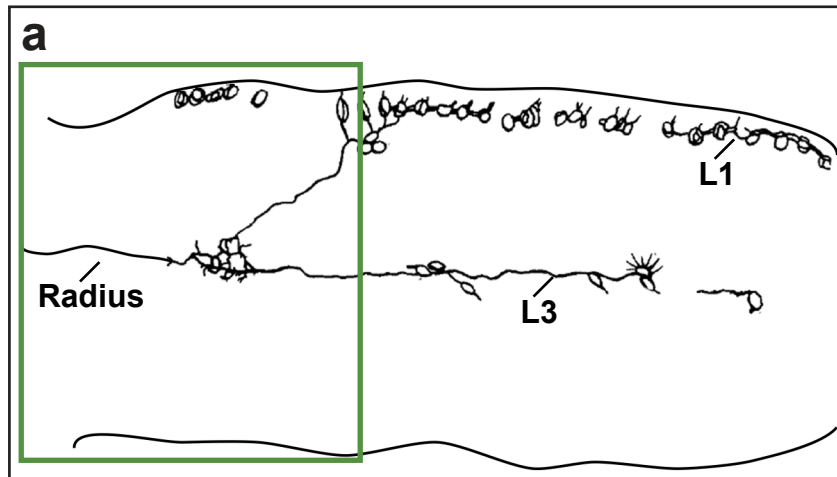

*NetB>GFP (NP4151)*

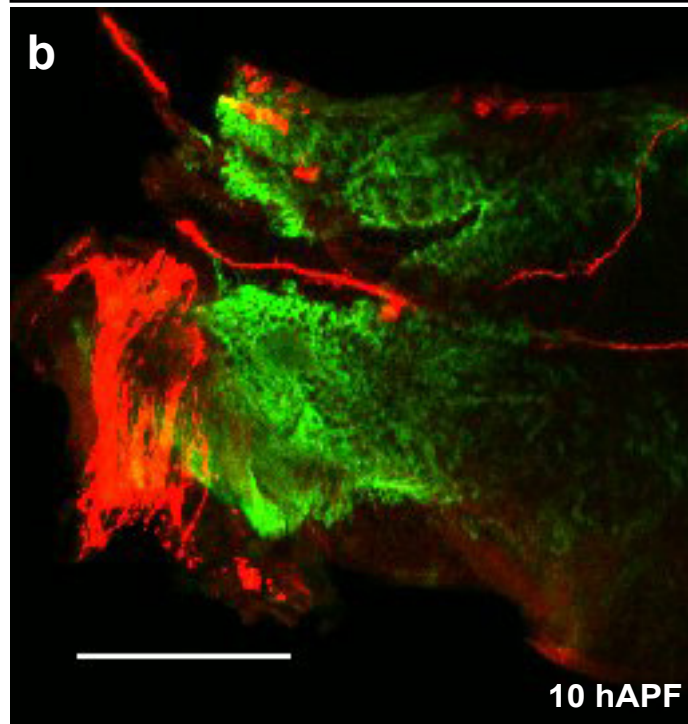

Supplement: supp [file elife-15983-supp-v1.zip]

Figure 9- figure supplement 1

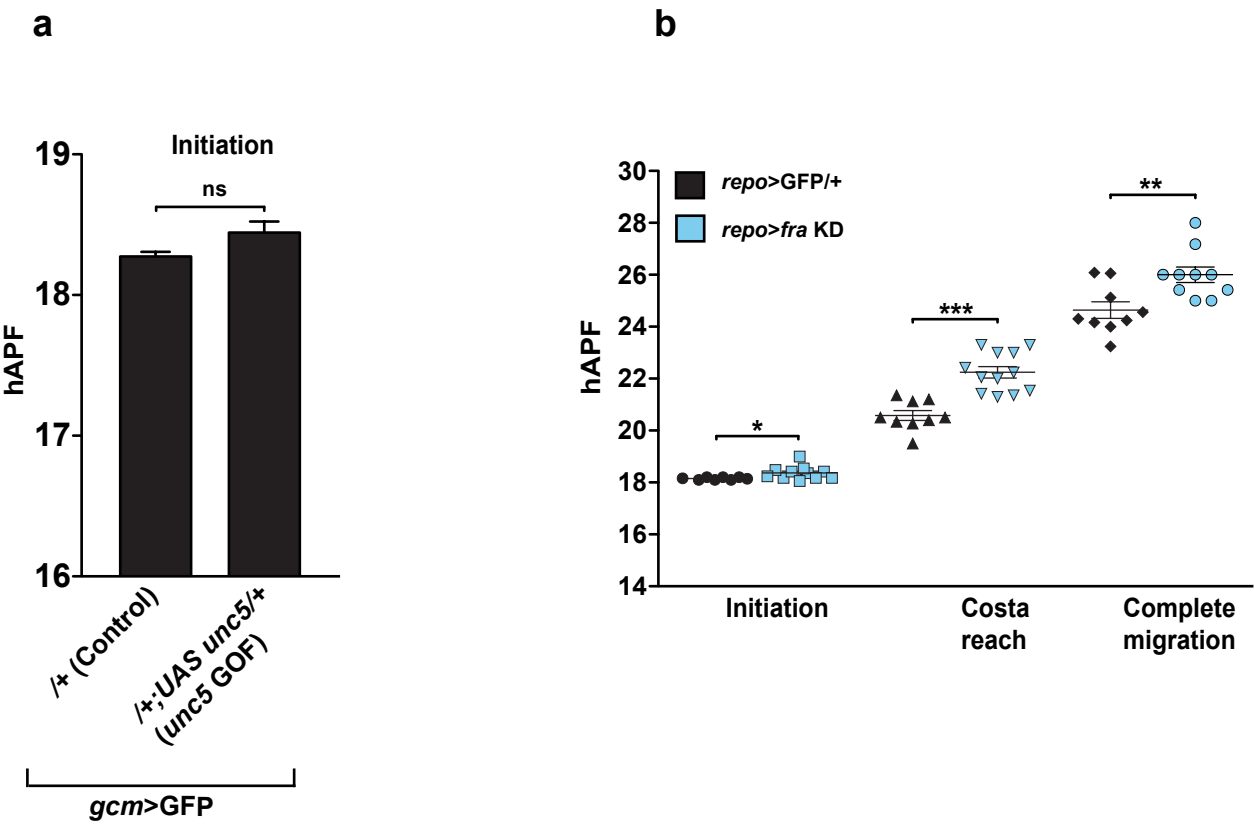

Supplement: supp [file elife-15983-supp-v1.zip]

Figure 6- figure supplement 1

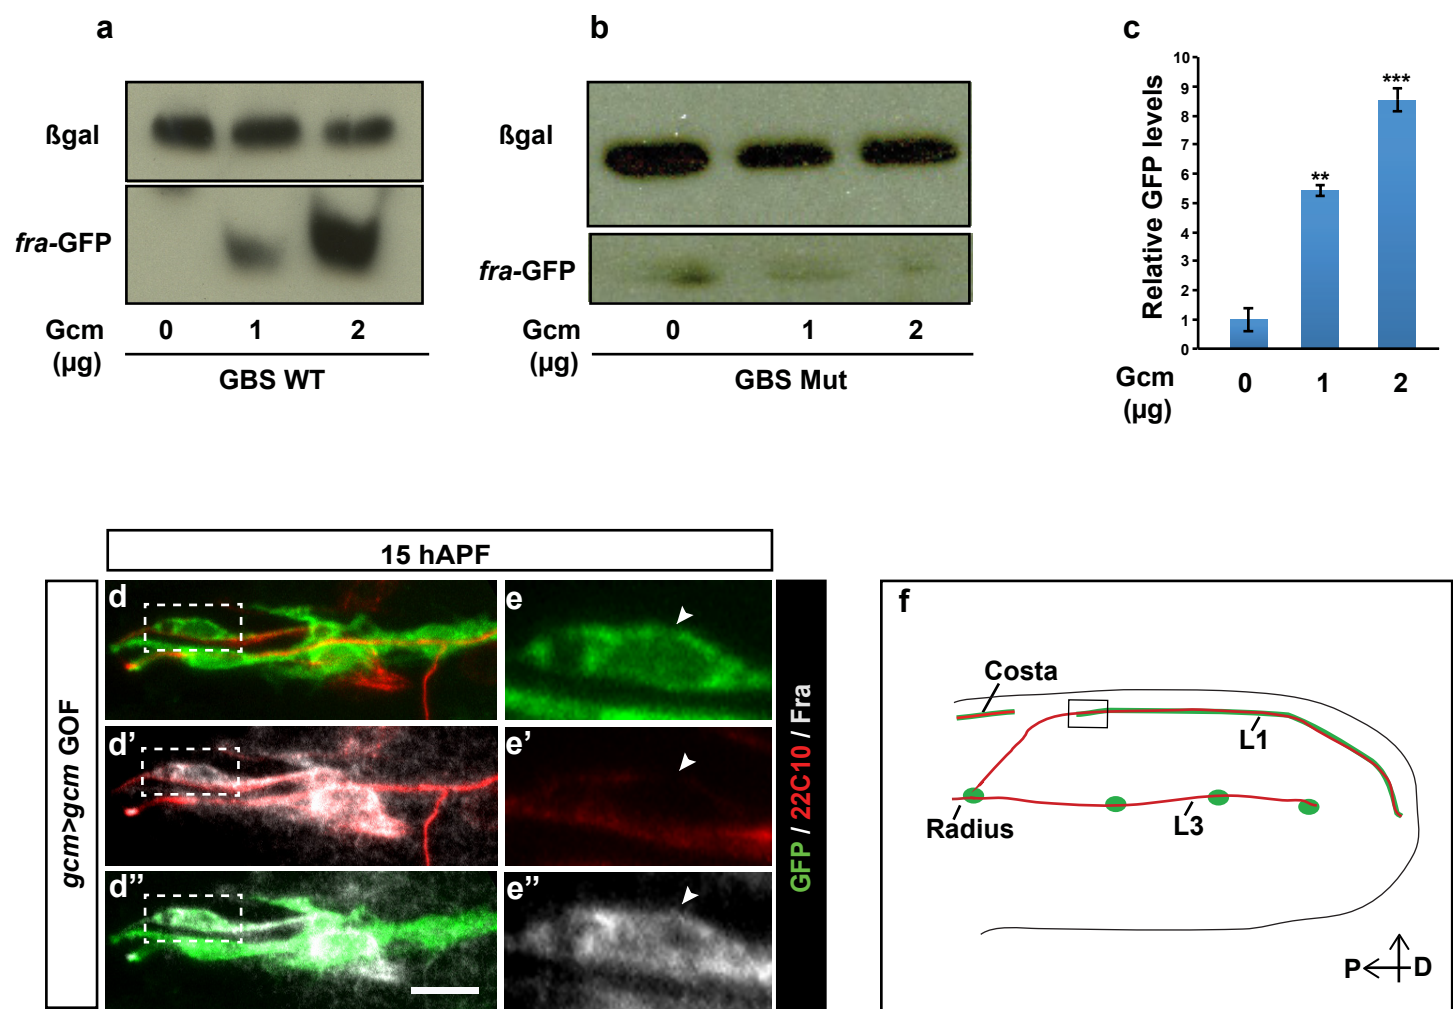

Supplement: supp [file elife-15983-supp-v1.zip]

Figure 8- figure supplement 1

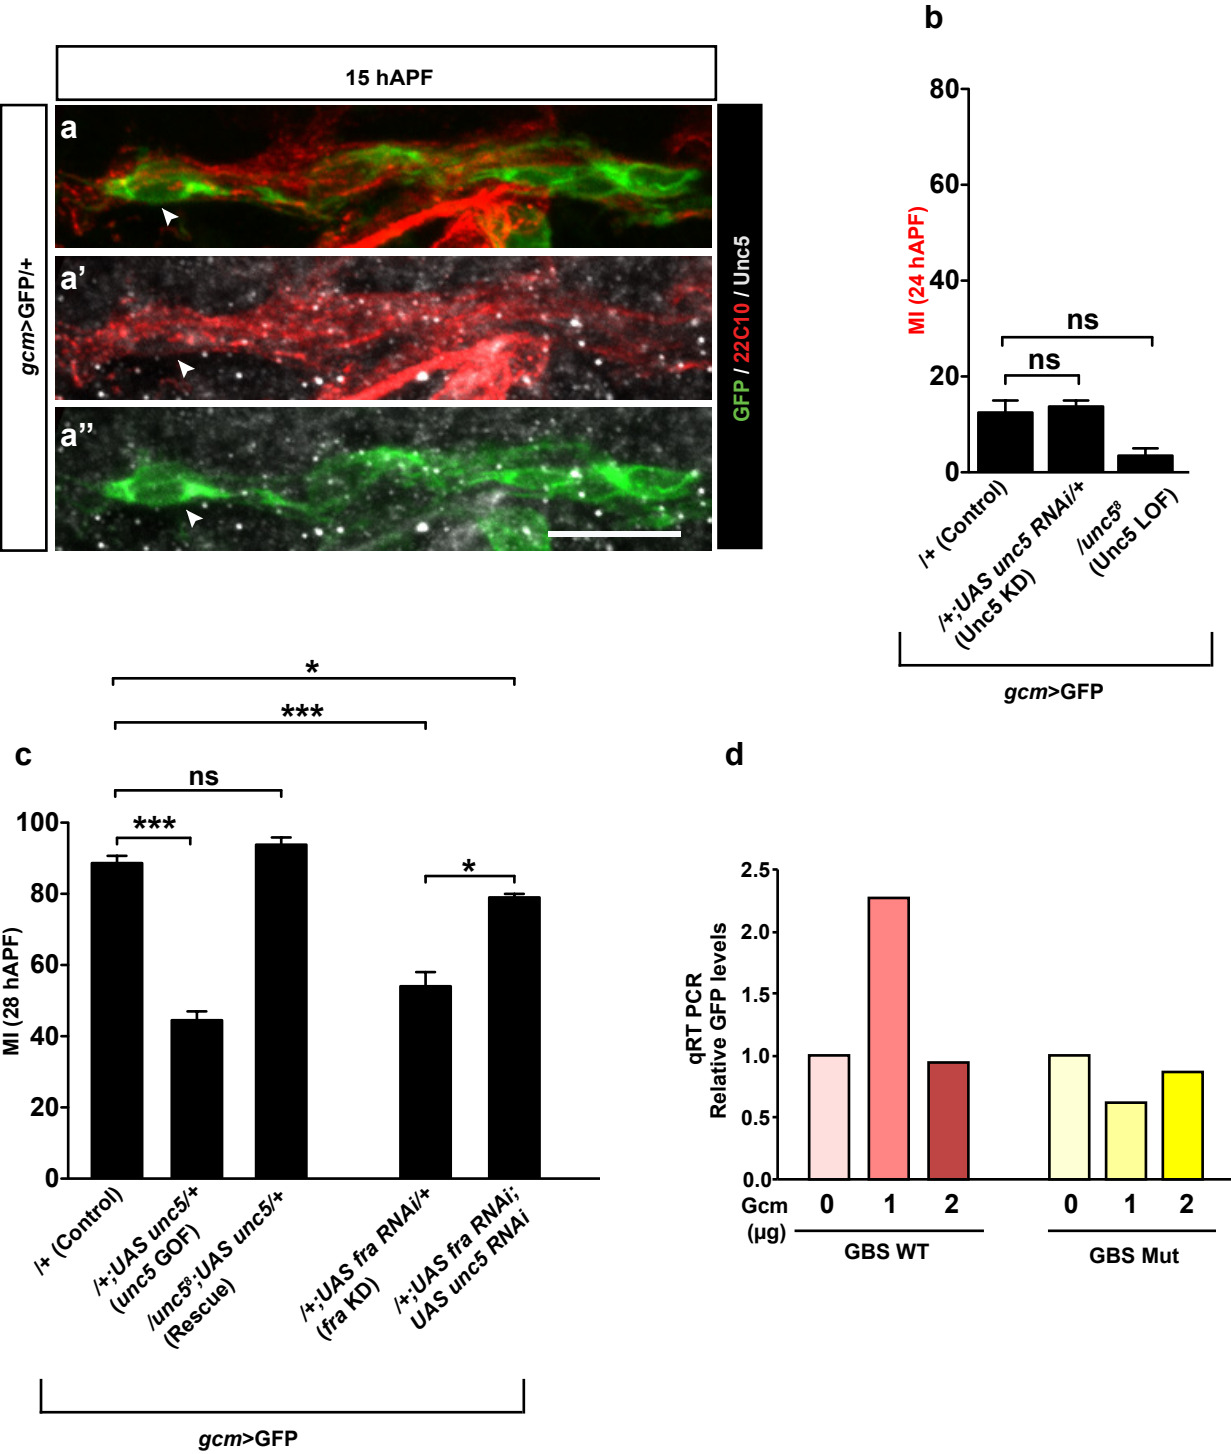

Supplement: supp [file elife-15983-supp-v1.zip]

Figure 7- figure supplement 1

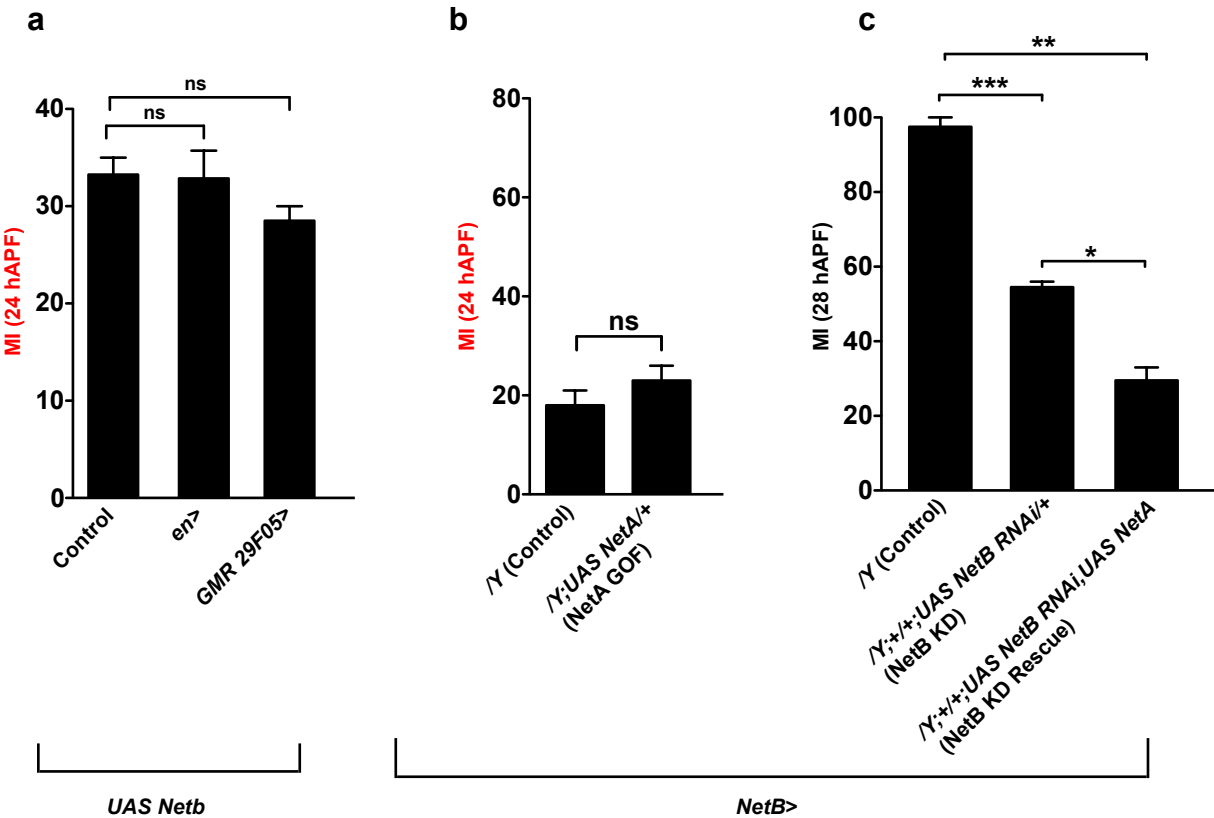

Supplement: supp [file elife-15983-supp-v1.zip]

Figure 3- figure supplement 1

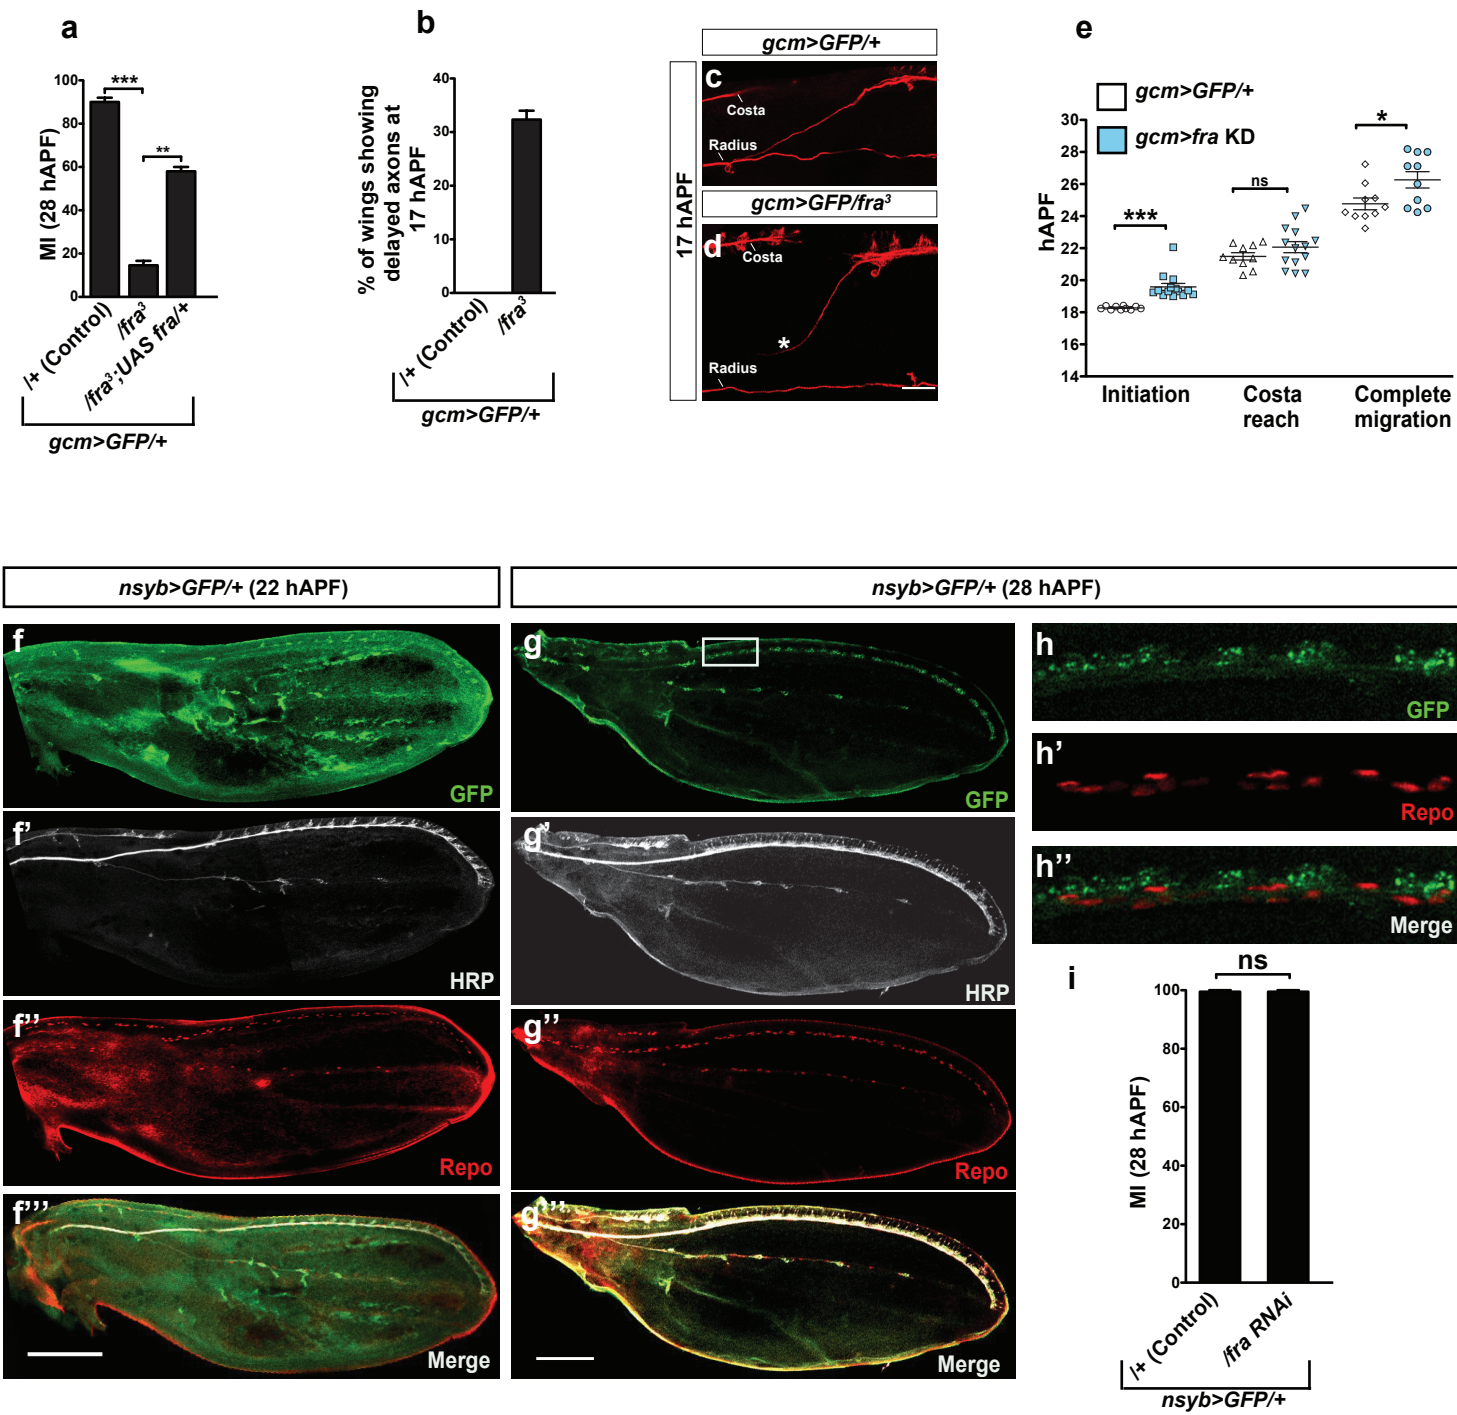

Supplement: supp [file elife-15983-supp-v1.zip]

Figure 5- figure supplement 1

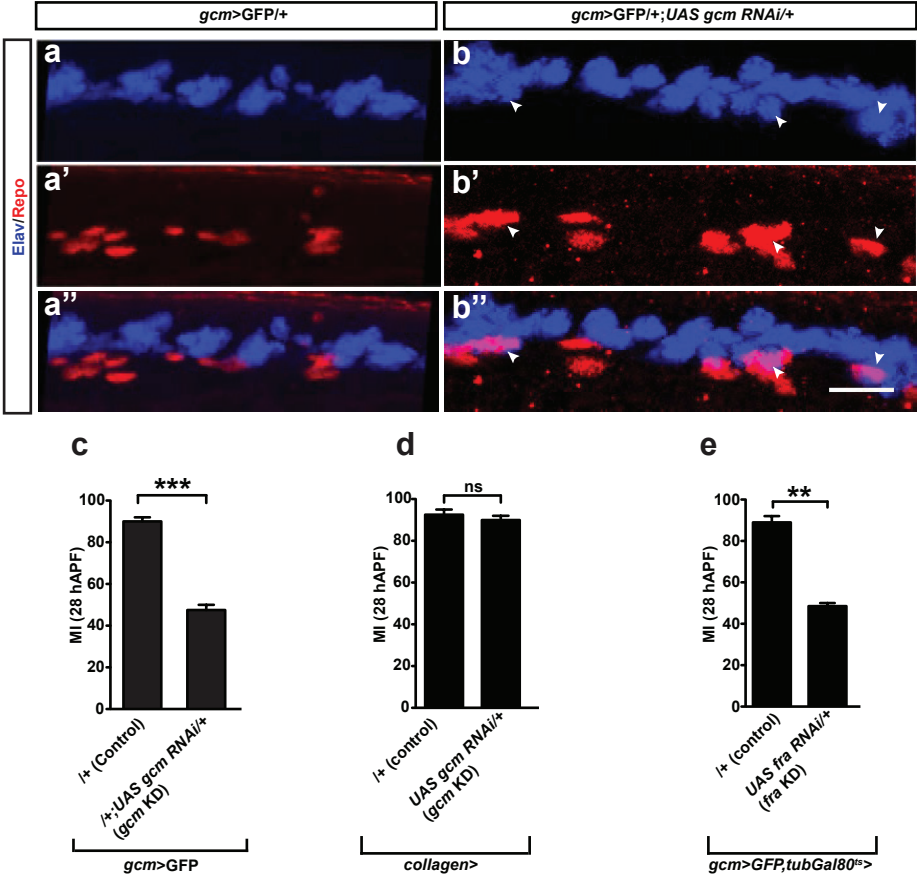

Supplement: supp [file elife-15983-supp-v1.zip]
